# Supplementary material for: Transgenic Expression of IL15 Improves Antiglioma Activity of IL13Rα2-CAR T Cells but Results in Antigen Loss Variants
Source: Oxford University Press journal article supplement (doi:10.1158/2326-6066.cir-16-0376), 2017-05-26
Supplement: 23266066cir160376-sup-176264_2_supp_4084279_8r4vzv.docx [file 23266066cir160376-sup-176264_2_supp_4084279_8r4vzv.docx]

| **Table 1:** **Tumor signal comparison** | P† |
| --- | --- |
| Day 7 |  |
| Delta IL15 vs. CAR IL15 | 0.8542 |
| Delta IL15 vs. CAR | 0.3583 |
| CAR IL15 vs. CAR | 0.0757 |
| Day 8 |  |
| Delta IL15 vs. CAR IL15 | 0.0982 |
| Delta IL15 vs. CAR | 0.0235 |
| CAR IL15 vs. CAR | 0.1041 |
| Day 14 |  |
| Delta IL15 vs. CAR IL15 | 0.0040 |
| Delta IL15 vs. CAR | 0.0040 |
| CAR IL15 vs. CAR | 0.1212 |
| Day 21 |  |
| Delta IL15 vs. CAR IL15 | 0.0027 |
| Delta IL15 vs. CAR | 0.0059 |
| CAR IL15 vs. CAR | 0.0113 |
| Day 28 |  |
| Delta IL15 vs. CAR IL15 | 0.0027 |
| Delta IL15 vs. CAR | 0.0059 |
| CAR IL15 vs. CAR | 0.3447 |
| Day 35 |  |
| Delta IL15 vs. CAR IL15 | 0.0058 |
| Delta IL15 vs. CAR | 0.0133 |
| CAR IL15 vs. CAR | 0.0010 |
| Day 49 |  |
| CAR IL15 vs. CAR | 0.0058 |
| Day 63 |  |
| CAR IL15 vs. CAR | 0.0454 |
| Day 84 |  |
| CAR IL15 vs. CAR | 0.0234 |
| †: Wilcoxon rank-sum test |  |
|  |  |
|  |  |
